# Supplementary material for: Exploring the unexpected electrochemical dynamics of lithium vanadyl phosphate electrodes in zinc battery systems
Source: Royal Society of Chemistry journal article supplement (doi:10.1039/d3ta07860d), 2024-01-01
Supplement: d3ta07860d1.pdf [file d3ta07860d1.pdf]

## Supplementary Information

### **Exploring the unexpected electrochemical dynamics of lithium vanadyl phosphate electrode in zinc battery system**

Dimas Yunianto Putro, Kiki Rezki Lestari, Muhammad Hilmy Alfaruqi, M. Ghalib Alfaza,  
Zulkifli, Moonsu Song, Seunggyeong Lee, Balaji Sambandam, Vinod Mathew, Jaekook Kim

Department of Materials Science and Engineering, Chonnam National University, Gwangju  
61186, Republic of Korea

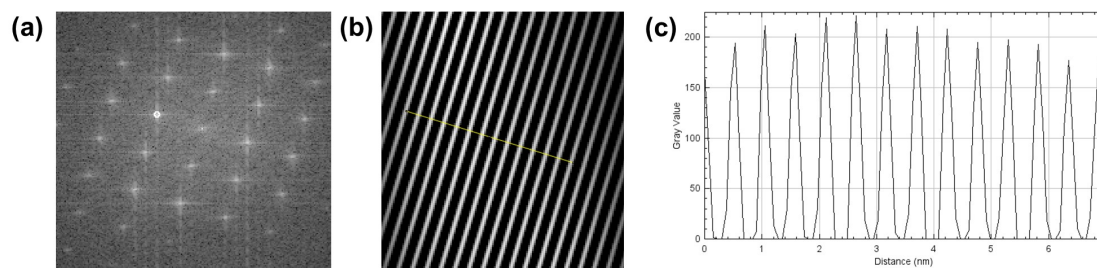

**Fig. S1** (a) FFT and (b) inverse FFT images analyzed using ImageJ. (c) The corresponding plot profile.

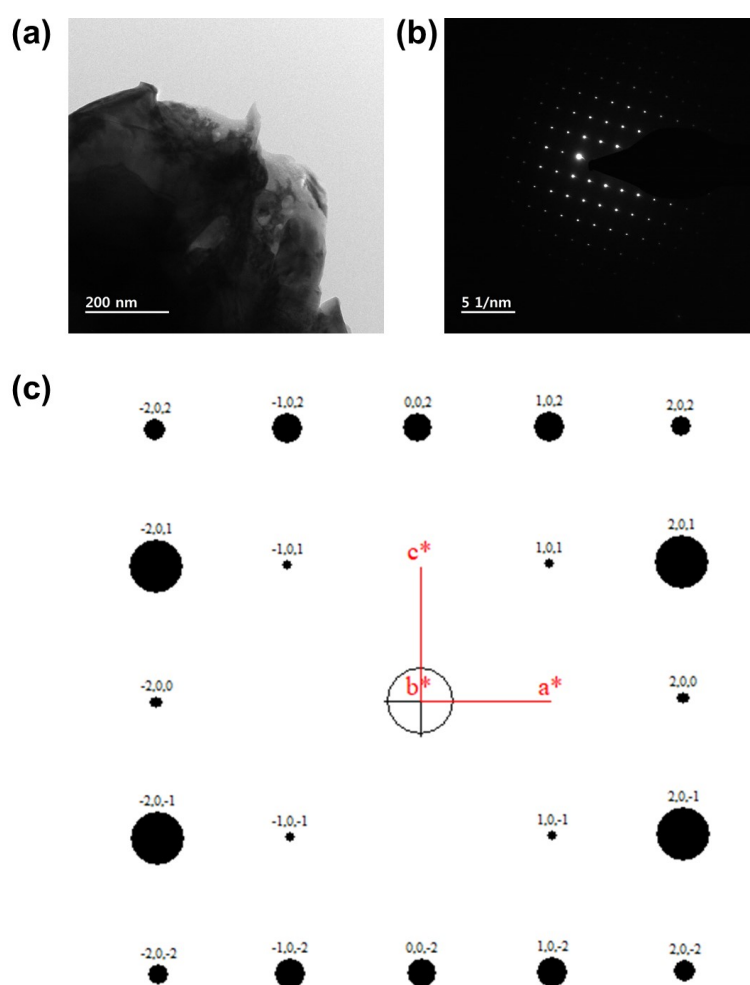

**Fig. S2** (a) TEM image of the powder, (b) corresponding selected area electron diffraction, and (c) reciprocal lattice indexed along [010] zone axis.

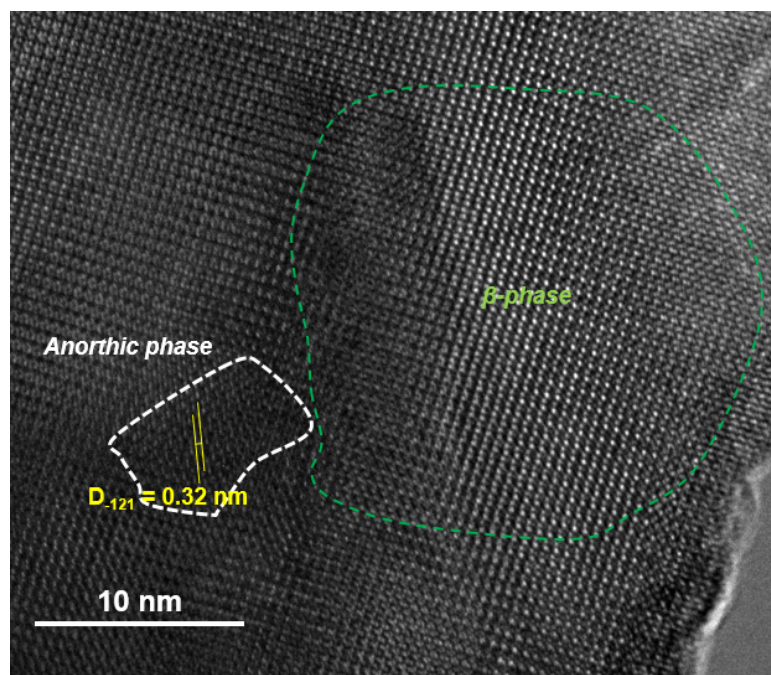

**Fig. S3** HR-TEM image of the sample.

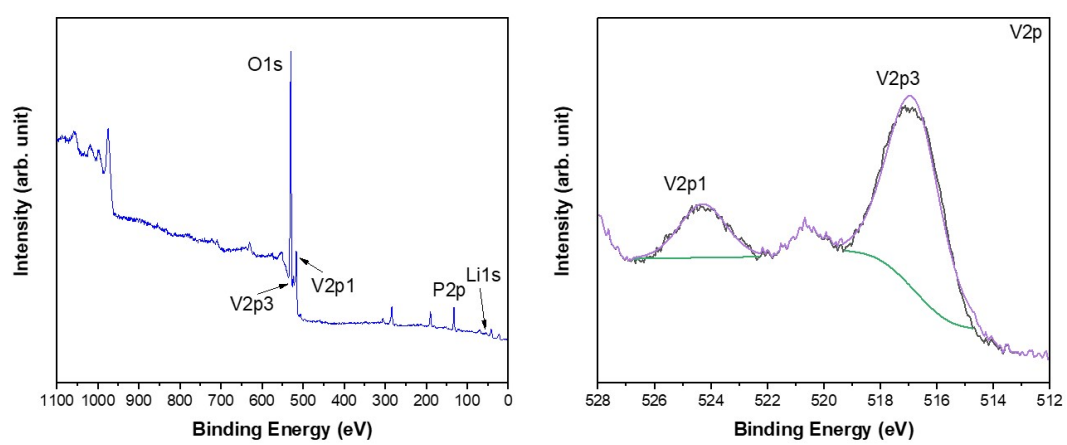

**Fig. S4** XPS spectrum of  $\beta$ -LiVOPo<sub>4</sub> sample.

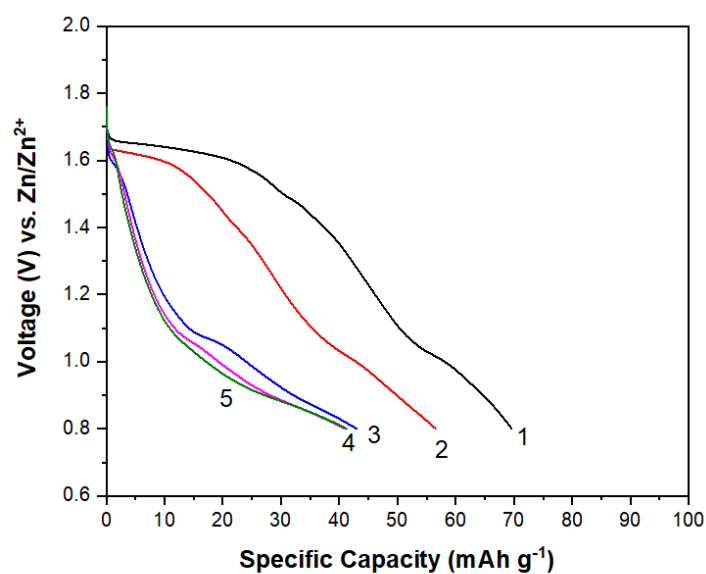

**Fig. S5** Electrochemical performance of  $\beta$ -LiVOPO<sub>4</sub> electrode using active material:conducting agent:binder ratio of 7:2:1.

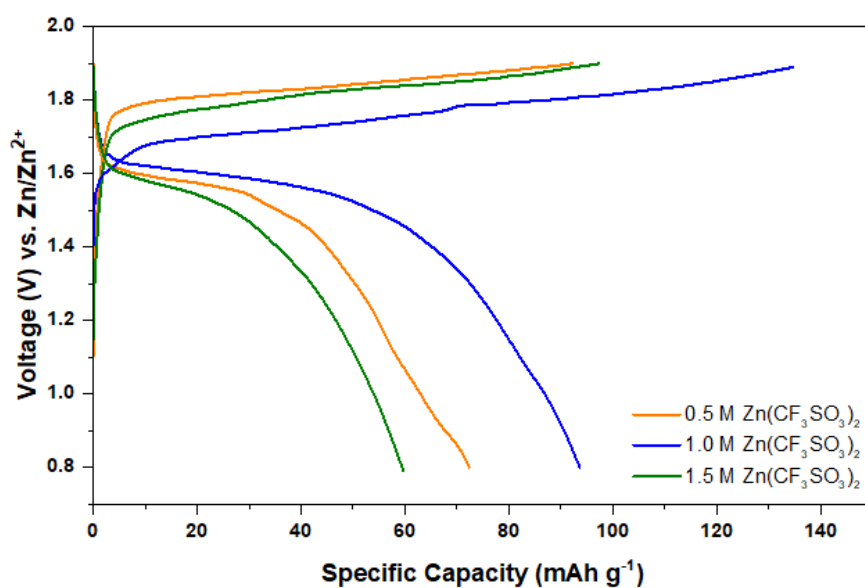

**Fig. S6** Initial voltage profiles of the Zn/ $\beta$ -LiVOPO<sub>4</sub> cells in different electrolyte concentrations cycled at a current density of 100 mA g<sup>-1</sup> within the potential window of 0.8 to 1.9 V.

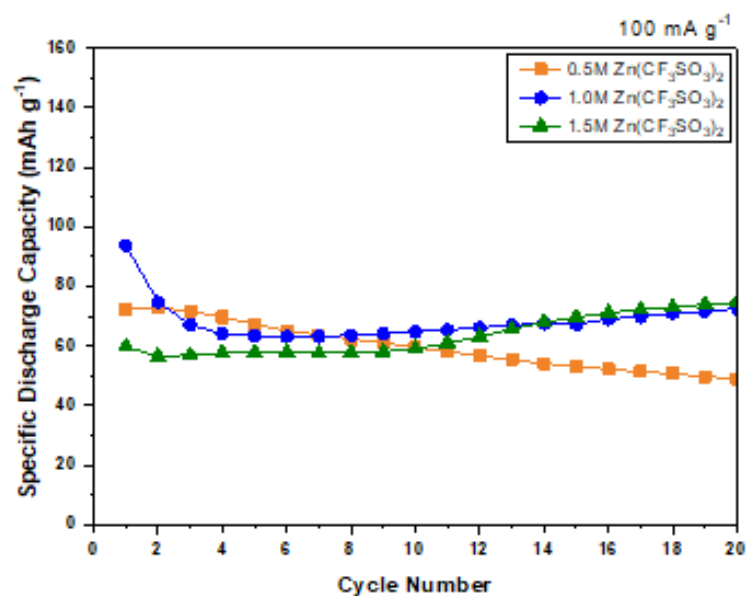

**Fig. S7** Cyclability test of the cathode using 0.5, 1.0, and 1.5 M Zn(CF<sub>3</sub>SO<sub>3</sub>)<sub>2</sub> electrolyte.

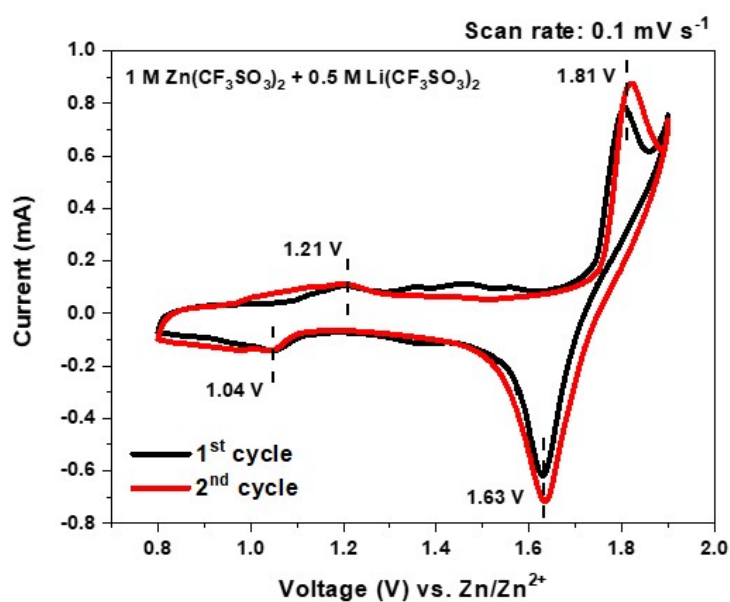

**Fig. S8** Cyclic voltammetry (CV) of  $\beta$ -LiVOPO<sub>4</sub> in a 1 M Zn(CF<sub>3</sub>SO<sub>3</sub>)<sub>2</sub> + 0.5 M Li(CF<sub>3</sub>SO<sub>3</sub>)<sub>2</sub> electrolytes.

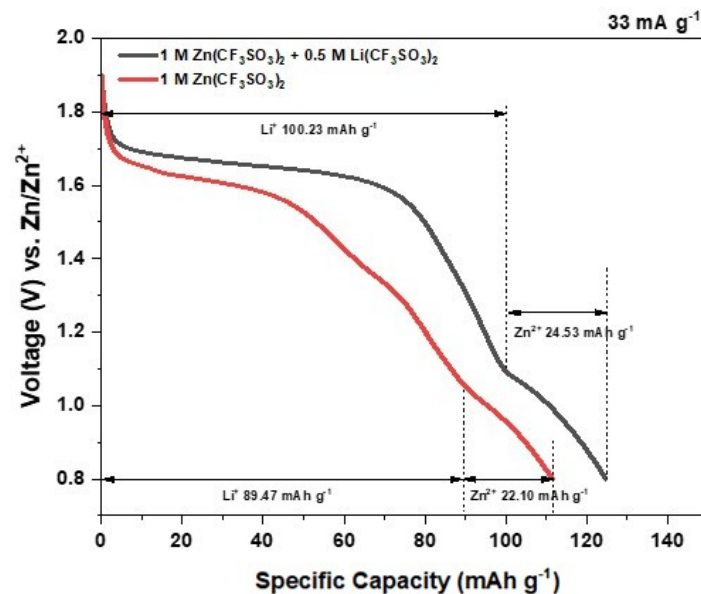

**Fig. S9** Comparison of electrochemical 1<sup>st</sup> discharge profiles of  $\beta$ -LiVOPO<sub>4</sub> in different electrolytes.

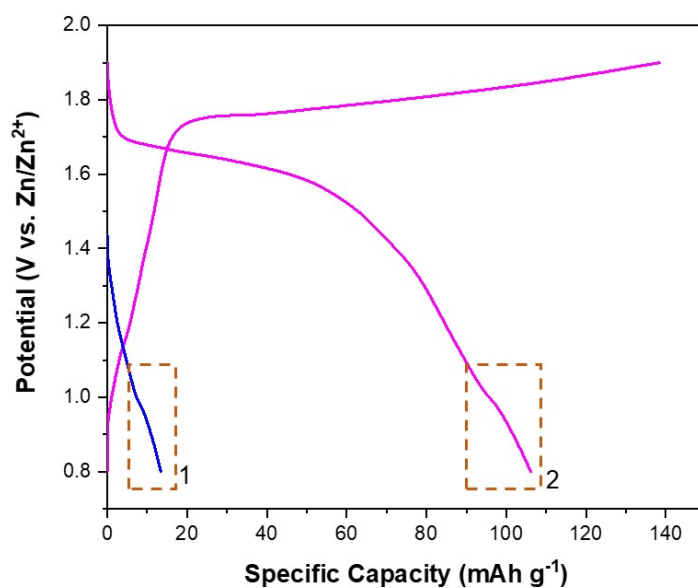

**Fig. S10** Initial voltage profiles of the Zn/ $\beta$ -LiVOPO<sub>4</sub> cells in 1 M Zn(CF<sub>3</sub>SO<sub>3</sub>)<sub>2</sub> electrolyte cycled at a current density of 100 mA g<sup>-1</sup> within the potential window of 0.8 to 1.9 V. The cell was initially discharged.

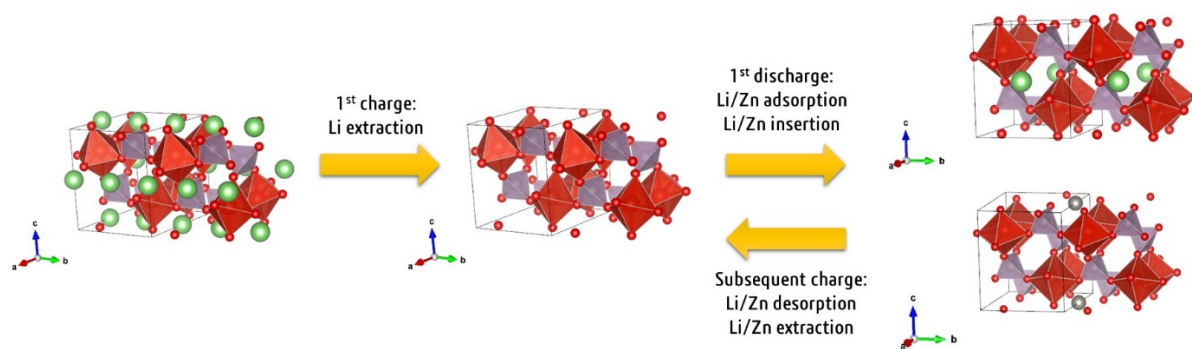

**Fig. S11** Proposed electrochemical mechanism of  $\beta$ -LiVOPO<sub>4</sub> cathode in the zinc cell.

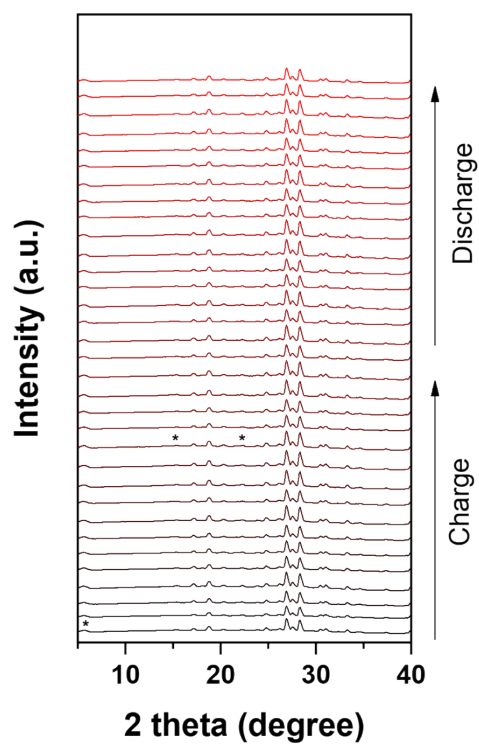

**Fig. S12** *In situ* SXRD patterns of the Zn/ $\beta$ -LiVOPO<sub>4</sub> cell taken during initial charge/discharge cycle.

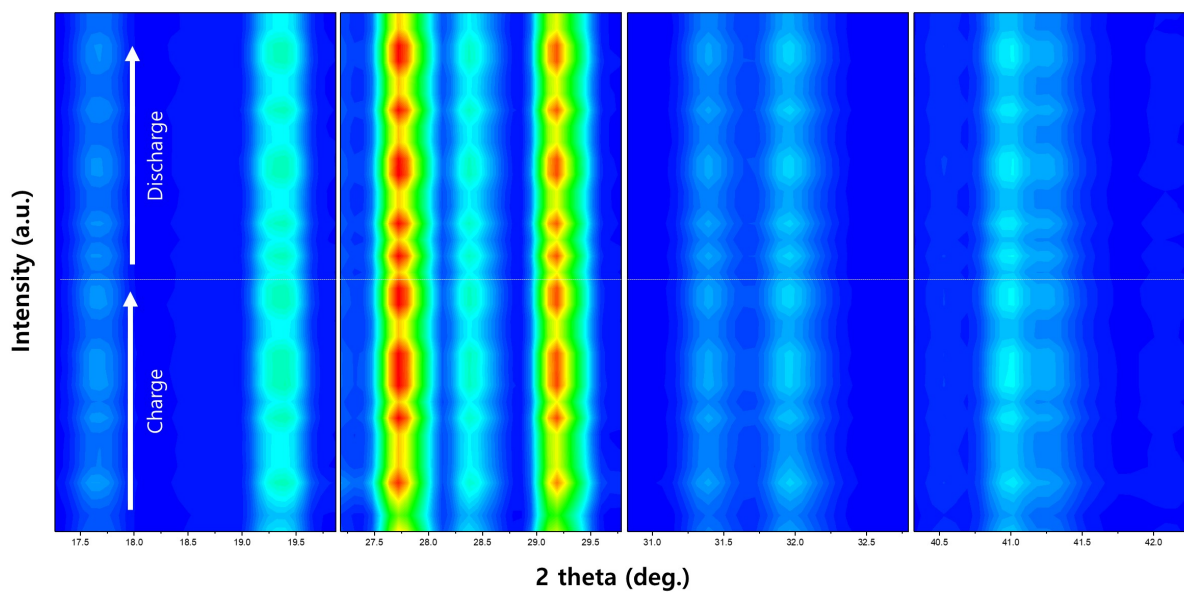

**Fig. S13** Magnified view of selected contour plots derived from *in situ* SXRD of the Zn/ $\beta$ -LiVOPO<sub>4</sub> cell obtained during initial charge/discharge cycle.

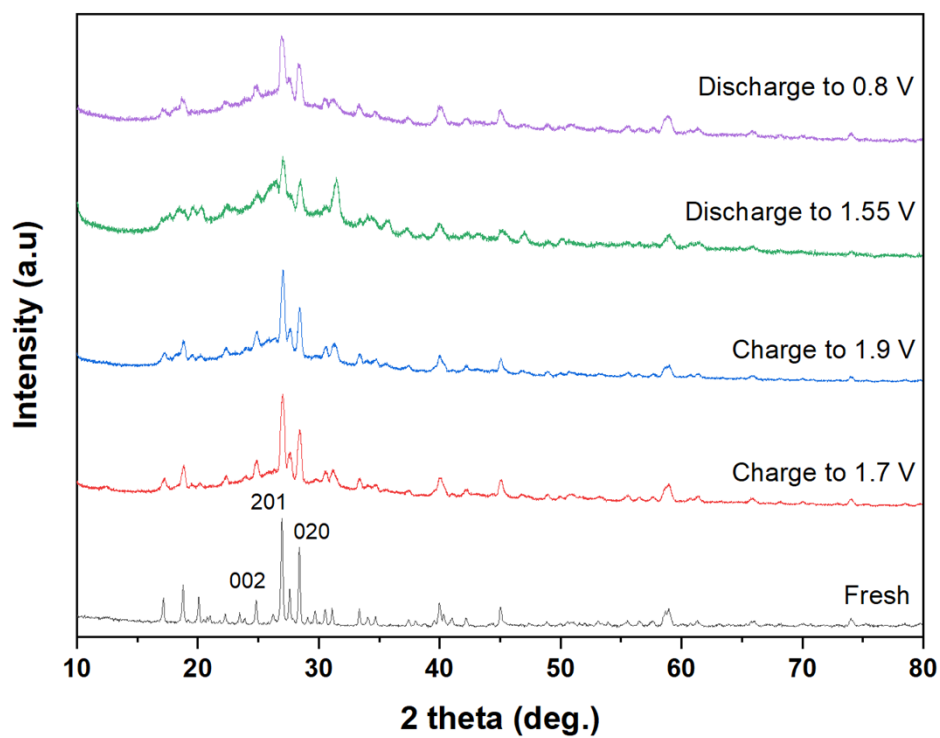

**Fig. S14** *Ex situ* XRD patterns of the cycled electrodes.

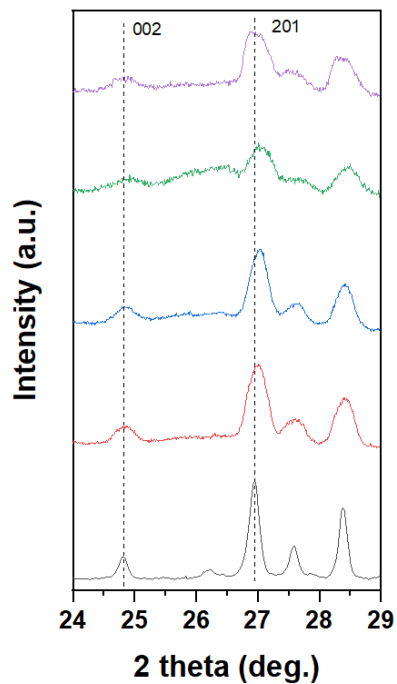

**Fig. S15** Magnified view of selected *ex situ* XRD patterns of the cycled electrodes derived from Fig. S14.

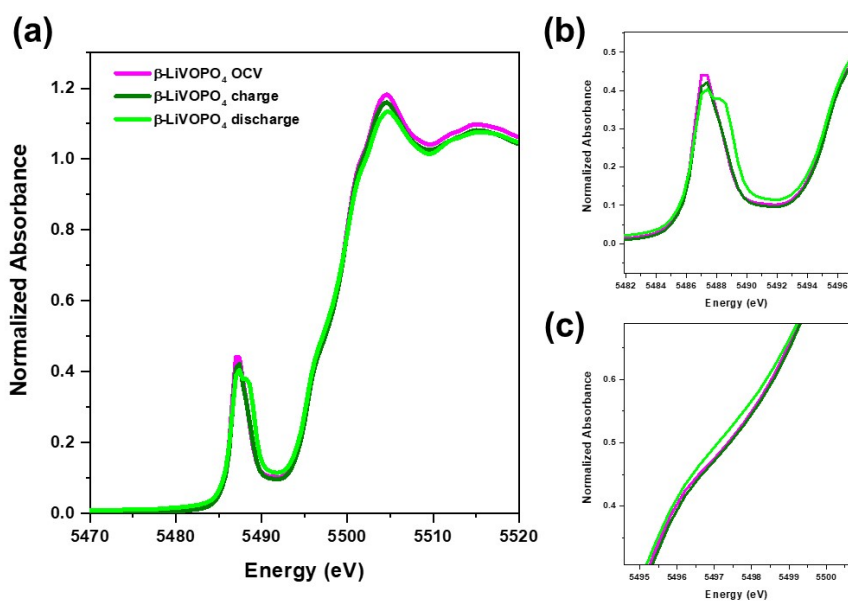

**Fig. S16** (a) *Ex-situ* V K-edge XANES spectra of the  $\beta$ -LiVOPO<sub>4</sub> OCV. Corresponding magnified (b) pre-edge and (c) main edge spectra.

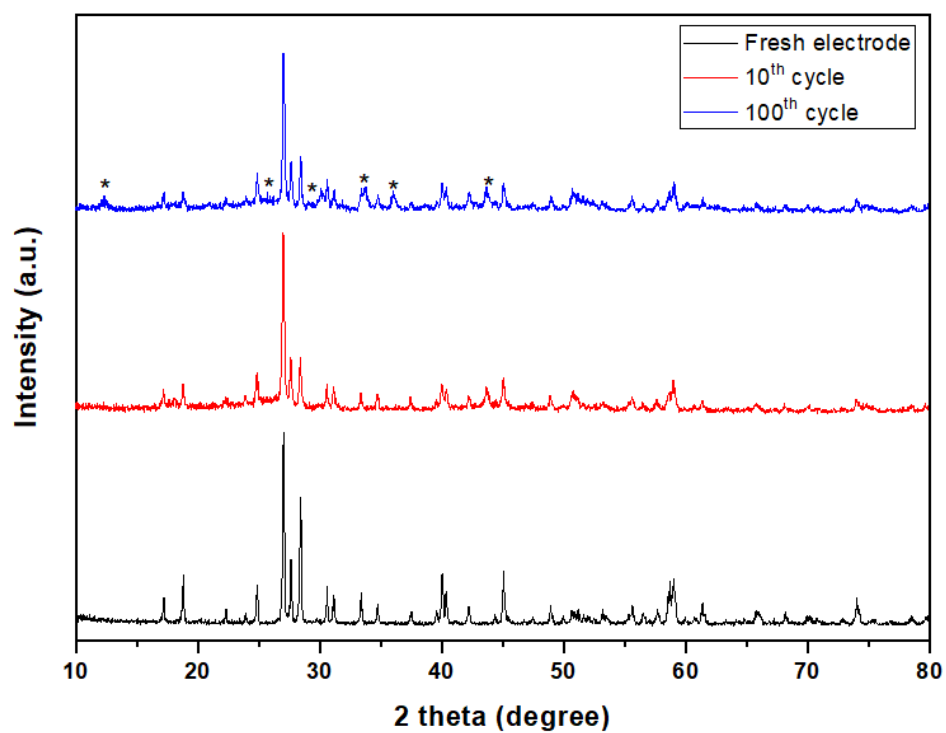

**Fig. S17** *Ex situ* XRD of the electrodes after 10<sup>th</sup> and 100<sup>th</sup> discharge cycles.

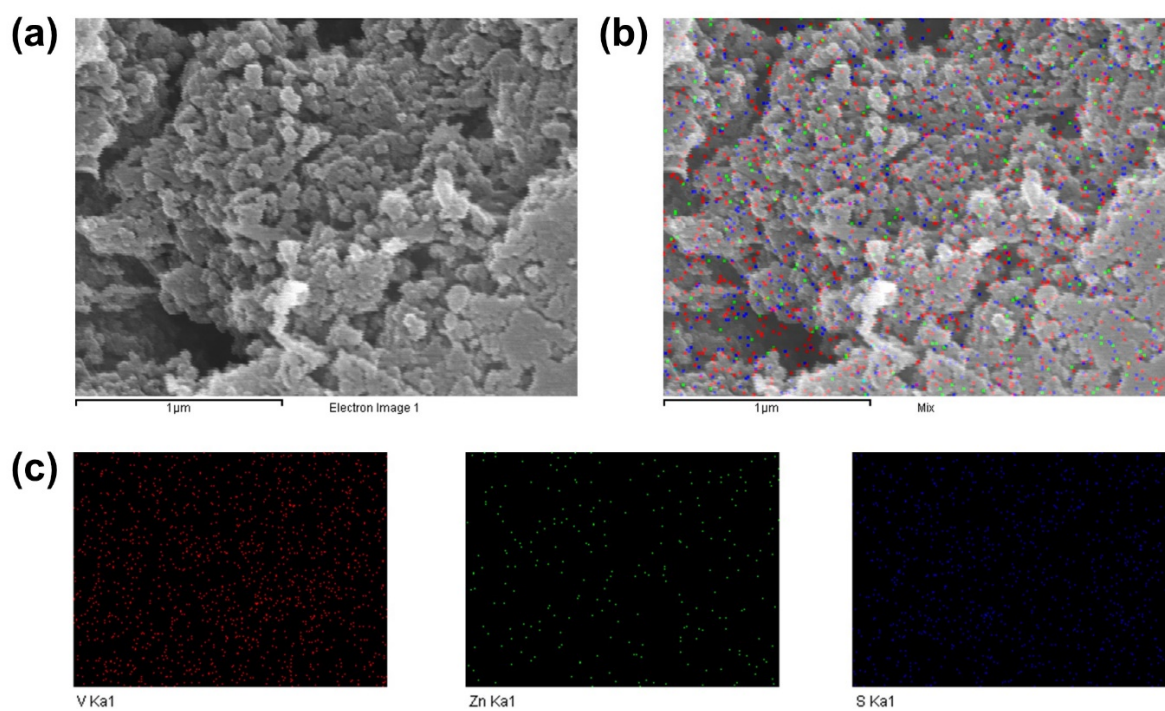

**Fig. S18** *Ex situ* SEM and EDX mapping of the cycled electrode.

**Table S1** Electrolyte pH value in various concentration.

| Electrolyte<br>Concentration (M) | pH   |
|----------------------------------|------|
| 0.5                              | 5.92 |
| 1                                | 5.56 |
| 1.5                              | 5.24 |
| 2                                | 4.85 |

**Table S2** *Ex-situ* ICP electrolyte after the initial charge and discharge cycles.

| Electrolyte               | Element | Concentration (ppm) |
|---------------------------|---------|---------------------|
| 1 <sup>st</sup> charge    | V       | 65                  |
|                           | Li      | 7.97                |
| 1 <sup>st</sup> discharge | V       | 21.80               |
|                           | Li      | 5.90                |
